# Supplementary material for: Connectome of a human foveal retina
Source: Research Square preprint supplement (doi:10.21203/rs.3.rs-7312705/v1), 2025-08-20
Supplement: Supplementary file 2 [file c2694bd9dd9b9e91557c3fa0.pdf]

# Supplementary Information for

## Visual pathway origins: connectome of a human foveal retina

Yeon Jin Kim<sup>1</sup>, Orin Packer<sup>1</sup>, Thomas Macrina<sup>2</sup>, Andreas Pollreisz<sup>3</sup>, Christine A. Curcio<sup>4</sup>, Kisuk Lee<sup>2</sup>, Nico Kemnitz<sup>2</sup>, Dodam Ih<sup>2</sup>, Tri Nguyen<sup>2</sup>, Ran Lu<sup>2</sup>, Sergiy Popovych<sup>2</sup>, Akhilesh Halageri<sup>2</sup>, J. Alexander Bae<sup>2</sup>, Joseph J. Strout<sup>2</sup>, Stephan Gerhard<sup>5</sup>, Robert G. Smith<sup>6</sup>, Paul R. Martin<sup>7</sup>, Ulrike Grünert<sup>7</sup>, Dennis M. Dacey<sup>1,8,\*</sup>

<sup>1</sup>Department of Neurobiology & Biophysics, University of Washington, Seattle, WA, 98195

<sup>2</sup>Zetta AI LLC, Sherrill, NY, USA

<sup>3</sup>Department of Ophthalmology, Medical University of Vienna, Vienna, Austria

<sup>4</sup>Department of Ophthalmology and Vision Sciences, University of Alabama at Birmingham, Alabama 35294

<sup>5</sup>Aware LLC, Rappenstrasse 19, 8307 Effretikon, Switzerland

<sup>6</sup>Department of Neuroscience, University of Pennsylvania, Philadelphia, PA 19104

<sup>7</sup>The University of Sydney, Save Sight Institute and Discipline of Ophthalmology, Faculty of Medicine and Health, Sydney, NSW, 2000, Australia

<sup>8</sup>Washington National Primate Research Center, Seattle, WA 98195

\*Corresponding author: Dennis M. Dacey (dmd@uw.edu)

### This PDF file includes:

Supplementary Data Tables 1 to 3

Supplementary Notes

26 **Supplementary Data Tables**

|                 |                                           |           |           |
|-----------------|-------------------------------------------|-----------|-----------|
| <b>a</b>        | <b>Summary</b>                            |           |           |
|                 | Type                                      | Total (n) | Total (%) |
|                 | Photoreceptor                             | 337       | 11.2 %    |
|                 | Horizontal cell                           | 265       | 8.8 %     |
|                 | Bipolar cell                              | 912       | 30.3 %    |
|                 | Amacrine cell                             | 293       | 9.7 %     |
|                 | Ganglion cell                             | 599       | 19.9 %    |
|                 | Müller glia                               | 555       | 18.5 %    |
|                 | Astrocyte                                 | 32        | 1.1 %     |
|                 | Microglia                                 | 15        | 0.5 %     |
|                 | Total                                     | 3008      | 100%      |
| <b>b</b>        | <b>Non-neuronal cells</b>                 |           |           |
|                 | Type                                      | Total (n) | Total (%) |
|                 | Müller glia                               | 555       | 92.2 %    |
|                 | Astrocytes                                | 32        | 5.3 %     |
|                 | Microglia                                 | 15        | 2.5 %     |
|                 | Total                                     | 602       | 100 %     |
| <b>c</b>        | <b>Cone photoreceptors</b>                |           |           |
|                 | Type                                      | Total (n) | Total (%) |
|                 | LM cone                                   | 297       | 94.9 %    |
|                 | S cone                                    | 16        | 5.1 %     |
|                 | Total                                     | 313       | 100%      |
| <b>d</b>        | <b>Rod and cone photoreceptors</b>        |           |           |
|                 | Type                                      | Total (n) | Total (%) |
|                 | Cone                                      | 313       | 92.9 %    |
|                 | Rod                                       | 24        | 7.1 %     |
|                 | Total                                     | 337       | 100%      |
| <b>e</b>        | <b>Horizontal cells</b>                   |           |           |
|                 | Type                                      | Total (n) | Total (%) |
|                 | H1                                        | 256       | 95.5 %    |
|                 | H2                                        | 12        | 4.5 %     |
|                 | Total                                     | 268       | 100%      |
| <b>f</b>        | <b>Bipolar cells (BCs)</b>                |           |           |
|                 | Type                                      | Total (n) | Total (%) |
| OFF             | FMB                                       | 302       | 33.1 %    |
|                 | DB1                                       | 54        | 5.9 %     |
|                 | DB2                                       | 92        | 10.1 %    |
|                 | DB3                                       | 41        | 4.5 %     |
|                 | Outer-x                                   | 15        | 1.6 %     |
|                 | DBbroad                                   | 18        | 2.0 %     |
| ON              | IMB                                       | 264       | 28.9 %    |
|                 | DB4                                       | 34        | 3.7 %     |
|                 | DB5                                       | 45        | 4.9 %     |
|                 | DB6                                       | 12        | 1.3 %     |
|                 | BB                                        | 17        | 1.9 %     |
|                 | RB                                        | 6         | 0.7 %     |
|                 | Inner-x                                   | 5         | 0.5 %     |
|                 | Unidentified                              | 7         | 0.8 %     |
|                 | Total                                     | 912       | 100%      |
| <b>g</b>        | <b>Amacrine cells (ACs)</b>               |           |           |
|                 | Type                                      | Total (n) | Total (%) |
|                 | AC2 (AII, small)                          | 75        | 25.6 %    |
|                 | AC3 (small)                               | 29        | 9.9 %     |
|                 | AC6 (small)                               | 24        | 8.2 %     |
|                 | AC11 (small)                              | 22        | 7.5 %     |
|                 | AC5 (small)                               | 20        | 6.8 %     |
|                 | AC4 (small)                               | 19        | 6.5 %     |
|                 | AC7 (SAC, large)                          | 17        | 5.8 %     |
|                 | AC16 (large)                              | 11        | 3.8 %     |
|                 | AC9 (Interplexiform, large)               | 11        | 3.8 %     |
|                 | AC10 (large)                              | 10        | 3.4 %     |
|                 | AC8 (large)                               | 10        | 3.4 %     |
|                 | AC19 (large)                              | 8         | 2.7 %     |
|                 | AC1 (A1?, large)                          | 6         | 2.0 %     |
|                 | AC12 (large)                              | 6         | 2.0 %     |
|                 | AC15 (large)                              | 6         | 2.0 %     |
|                 | AC17 (large)                              | 6         | 2.0 %     |
|                 | AC13 (large)                              | 5         | 1.7 %     |
|                 | AC18 (large)                              | 5         | 1.7 %     |
|                 | AC14 (large)                              | 3         | 1.0 %     |
|                 | Total                                     | 293       | 100 %     |
| <b>h</b>        | <b>Ganglion cells (GCs)</b>               |           |           |
|                 | Type                                      | Total (n) | Total (%) |
| Major GCs       | OFF midget                                | 280       | 46.7 %    |
|                 | OFF parasol                               | 13        | 2.2 %     |
|                 | ON midget                                 | 256       | 42.7 %    |
|                 | ON parasol                                | 13        | 2.2 %     |
|                 | SBGC                                      | 12        | 2.0 %     |
| Large Field GCs | LFGC1 (LBGC)                              | 6         | 1.0 %     |
|                 | LFGC2 (Large diffuse)                     | 6         | 1.0 %     |
|                 | LFGC3 (Recursive bistratified)            | 4         | 0.7 %     |
|                 | LFGC4 (Inner/outer smooth monostratified) | 5         | 0.8 %     |
|                 | LFGC5 (Inner sparse)                      | 4         | 0.7 %     |
|                 | Total                                     | 599       | 100 %     |

| a Cone 21 (LM cone 21) |    |              |                   |                   | d Cone 54 (S cone 6) |    |              |                   |                   |
|------------------------|----|--------------|-------------------|-------------------|----------------------|----|--------------|-------------------|-------------------|
|                        | NO | GC types     | Total synapse (#) | Total percent (%) |                      | NO | GC types     | Total synapse (#) | Total percent (%) |
| Major GCs              | 1  | ON MG        | 63                | 13.8 %            | Major GCs            | 1  | ON MG        | 66                | 19.4 %            |
|                        | 2  | OFF MG       | 105               | 23.0 %            |                      | 2  | OFF MG       | 129               | 37.9 %            |
|                        | 3  | ON Parasol   | 51                | 11.4 %            |                      | 3  | ON Parasol   | 44                | 12.9 %            |
|                        | 4  | OFF Parasol  | 213               | 46.1 %            |                      | 4  | OFF Parasol  | 64                | 18.8 %            |
|                        | 5  | SBGC         | 1                 | 0.2 %             |                      | 5  | SBGC         | 18                | 5.4 %             |
| Large Field GCs        | 6  | LFGC1 (LBGC) | 9                 | 2.0 %             | Large Field GCs      | 6  | LFGC1 (LBGC) | 1                 | 0.3 %             |
|                        | 7  | LFGC2        | 3                 | 0.7 %             |                      | 7  | LFGC2        | 14                | 4.1 %             |
|                        | 8  | LFGC3        | 3                 | 0.7 %             |                      | 8  | LFGC3        | 0                 | 0.0 %             |
|                        | 9  | LFGC4        | 5                 | 1.1 %             |                      | 9  | LFGC4        | 3                 | 0.9 %             |
|                        | 10 | LFGC5        | 0                 | 0.0 %             |                      | 10 | LFGC5        | 0                 | 0.0 %             |
|                        | 11 | Melanopsin?  | 4                 | 0.9 %             |                      | 11 | Melanopsin   | 1                 | 0.3 %             |
|                        | 12 | Unidentified | 1                 | 0.2 %             |                      | 12 | Unidentified | 0                 | 0.0 %             |
| Total                  |    |              | 457               | 100%              | Total                |    |              | 340               | 100%              |

  

| b Cone 22 (LM cone 22) |    |              |                   |                   | e Cone 103 (S cone 5) |    |              |                   |                   |
|------------------------|----|--------------|-------------------|-------------------|-----------------------|----|--------------|-------------------|-------------------|
|                        | NO | GC types     | Total synapse (#) | Total percent (%) |                       | NO | GC types     | Total synapse (#) | Total percent (%) |
| Major GCs              | 1  | ON MG        | 69                | 16.0 %            | Major GCs             | 1  | ON MG        | 22                | 7.2 %             |
|                        | 2  | OFF MG       | 101               | 23.7 %            |                       | 2  | OFF MG       | 118               | 38.8 %            |
|                        | 3  | ON Parasol   | 65                | 15.1 %            |                       | 3  | ON Parasol   | 19                | 6.3 %             |
|                        | 4  | OFF Parasol  | 139               | 33.1 %            |                       | 4  | OFF Parasol  | 80                | 26.3 %            |
|                        | 5  | SBGC         | 2                 | 0.5 %             |                       | 5  | SBGC         | 43                | 14.1 %            |
| Large Field GCs        | 6  | LFGC1 (LBGC) | 25                | 5.8 %             | Large Field GCs       | 6  | LFGC1 (LBGC) | 1                 | 0.3 %             |
|                        | 7  | LFGC2        | 3                 | 0.7 %             |                       | 7  | LFGC2        | 9                 | 3.0 %             |
|                        | 8  | LFGC3        | 3                 | 0.7 %             |                       | 8  | LFGC3        | 2                 | 0.7 %             |
|                        | 9  | LFGC4        | 7                 | 1.6 %             |                       | 9  | LFGC4        | 4                 | 1.3 %             |
|                        | 10 | LFGC5        | 2                 | 0.5 %             |                       | 10 | LFGC5        | 0                 | 0.0 %             |
|                        | 11 | Melanopsin?  | 4                 | 0.9 %             |                       | 11 | Melanopsin   | 0                 | 0.0 %             |
|                        | 12 | Unidentified | 6                 | 1.4 %             |                       | 12 | Unidentified | 6                 | 2.0 %             |
| Total                  |    |              | 431               | 100%              | Total                 |    |              | 304               | 100%              |

  

| c Cone 58 (LM cone 58) |    |              |                   |                   |
|------------------------|----|--------------|-------------------|-------------------|
|                        | NO | GC types     | Total synapse (#) | Total percent (%) |
| Major GCs              | 1  | ON MG        | 39                | 13.8 %            |
|                        | 2  | OFF MG       | 73                | 25.8 %            |
|                        | 3  | ON Parasol   | 54                | 19.1 %            |
|                        | 4  | OFF Parasol  | 98                | 34.6 %            |
|                        | 5  | SBGC         | 0                 | 0.0 %             |
| Large Field GCs        | 6  | LFGC1 (LBGC) | 2                 | 0.7 %             |
|                        | 7  | LFGC2        | 11                | 3.9 %             |
|                        | 8  | LFGC3        | 2                 | 0.7 %             |
|                        | 9  | LFGC4        | 4                 | 1.4 %             |
|                        | 10 | LFGC5        | 0                 | 0.0 %             |
|                        | 11 | Melanopsin   | 0                 | 0.0 %             |
|                        | 12 | Unidentified | 0                 | 0.0 %             |
| Total                  |    |              | 283               | 100%              |

**Supplementary Data Table 2. Total excitatory synaptic output from a single cone.**

|                                                 |                                                                                                                                                                                                                                                                                                                                                                                                                                                     |
|-------------------------------------------------|-----------------------------------------------------------------------------------------------------------------------------------------------------------------------------------------------------------------------------------------------------------------------------------------------------------------------------------------------------------------------------------------------------------------------------------------------------|
| Non-neuronal cells<br>(related to Figure S1)    | <a href="#">Microglia cells</a><br><a href="#">Astrocytes</a><br><a href="#">Müller Glia cells</a>                                                                                                                                                                                                                                                                                                                                                  |
| Horizontal cells<br>(related to Figures 2C, 2D) | <a href="#">H1 Horizontal cells</a><br><a href="#">H2 Horizontal cells</a>                                                                                                                                                                                                                                                                                                                                                                          |
| Photoreceptors<br>(related to Figure 2A)        | <a href="#">LM/S Cones + Rods</a>                                                                                                                                                                                                                                                                                                                                                                                                                   |
| Bipolar cells<br>(related to Figure 3)          | <a href="#">IMB (ON midget bipolar cells)</a><br><a href="#">FMB (OFF midget bipolar cells)</a><br><a href="#">Blue cone bipolar cells (BB cells)</a><br><a href="#">ON diffuse bipolar cells (DB4, DB5, DB6)</a><br><a href="#">OFF diffuse bipolar cells (DB1, DB2, DB3)</a><br><a href="#">RB (rod bipolar)</a><br><a href="#">Outer-x</a><br><a href="#">Inner-x</a><br><a href="#">Giant</a><br><a href="#">DBbroad (diffuse bipolar type)</a> |
| Amacrine cells<br>(related to Figures 4, 5)     | <a href="#">AC2 (All amacrine cells)</a><br><a href="#">AC7 (starburst amacrine cells)</a><br><a href="#">AC 8</a><br><a href="#">AC 11</a>                                                                                                                                                                                                                                                                                                         |
| Ganglion cells<br>(related to Figure 7)         | <a href="#">ON and OFF midget ganglion cells and the midget circuit</a><br><a href="#">ON/OFF parasol ganglion cells</a><br><a href="#">Small bistratified ganglion cells</a><br><a href="#">LFGC1 (Large bistratified)</a><br><a href="#">LFGC2 (Large diffuse)</a><br><a href="#">LFGC3 (Recursive bistratified)</a><br><a href="#">LFGC4 (Smooth monostratified)</a>                                                                             |

**Supplementary Data Table 3. Links to cells in NeuroMaps.** The second columns contain clickable links to view the various neurons that make up the HFseg1 volume.

38 **Supplementary Notes**

39 **Descriptions of Supplementary Notes on cell type identification**

40 **Rods and cones.** Rod and cone photoreceptors were distinguished by the well-established and  
41 distinctive morphology of their axon terminals, the rod small spherules ( $n = 24$ ) and the large cone  
42 pedicles ( $n = 313$ ). We also confirmed that the invaginating contact to the small number of rod  
43 spherules in our volume derived from subsequently identified rod bipolar cells. Note also that rods could  
44 also be distinguished from cones by the much smaller diameter of their axons within the Henle fiber  
45 layer (HFL). These features were not quantified but are evident in the segmented 3D view of the cell's  
46 morphology.

47 Unlike in macaque and marmoset retina, human S cone pedicles ( $n = 16$ ) were not easily distinguished  
48 by smaller overall size, reduced ribbon synapse number or lack of telodendritic contacts with  
49 neighboring cone pedicles (Fig. 2a; Supplementary Table 1c). We therefore relied on the distinctive  
50 dendritic and axonal morphology of the blue cone bipolar type (BB) that makes selective invaginating  
51 contact with S cones and the concomitant lack of an ON-midget bipolar (IMB) connection. The L and M  
52 cone pedicles have not been previously distinguished by morphology or connectivity, with one possible  
53 exception. In the present dataset we have not yet attempted to determine if two groups of non-S cone  
54 pedicles are present and have used LM to refer to the combined L and M cone pedicles ( $n = 297$ ) (Fig.  
55 2a; Supplementary Table 1c).

56 **Horizontal cells.** Morphological and connectional differences defining H1 and H2 horizontal cell types  
57 in the primate retina are well established and largely consistent in the HFseg1 volume. However, H1  
58 cells frequently contact S cones and greatly outnumbered H2 cells. The H1 cells ( $n = 256$ ,  
59 Supplementary Table 1e) were distinguished by small ( $\sim 30\text{--}50\ \mu\text{m}$  diameter) and profusely branched  
60 dendritic trees (Fig. 2c). Neighboring H1 cells overlapped extensively such that each cone pedicle was  
61 contacted by several H1 cells. A characteristic single, long axon-like process arose from the soma and  
62 extended to the edge of the volume within the OPL without branching. These long unbranched

63 processes are known to terminate in a profuse arbor that innervates rod spherules<sup>1, 2</sup>. All H1 cell axons  
64 in HFseg1 extended beyond the volume boundaries and did not contact the rod spherules within the  
65 volume which were therefore innervated by axonal processes that originated from H1 cells outside the  
66 volume. In contrast to H1 cells, the H2 cells (n = 12, Supplementary Table 1e) showed very large, and  
67 loosely branched dendritic trees (>100 µm in diameter) that showed little dendritic overlap with  
68 neighboring H2 cells<sup>3-5</sup> (Fig. 2d). The long H2 cell dendrites tended to converge on and contact S cones  
69 located within their fields, while only sparsely contacting LM cones (Extended Data Fig. 4). The axon of  
70 the H2 cell is also distinguishes it from the H1 cell in that it takes a meandering course, branches  
71 sparsely and gives rise to lateral elements in widely spaced cones; most of which are also S cones.

72 **Bipolar cells.** In foveate primates, flat (FMB, OFF type) and invaginating (IMB, ON Type) midget  
73 bipolar cells show dominant connections to single cones and ganglion cells, whereas diffuse types  
74 contact several cones and comprise 8 previously recognized types (DB1, 2, 3a, 3b, 4, 5, 6 and Giant)<sup>6</sup>  
75 (Fig. 3). A single blue cone bipolar (BB) cell type shows selective targeting of S cones (Extended Data  
76 Fig. 5), and a single rod bipolar type makes selective contact with rod spherules. It was possible to  
77 recognize and annotate all of these types in HFseg1 with the exception of the DB3a-DB3b distinction  
78 recently made in macaque and human retina<sup>7-12</sup> and the possible absence of the Giant type.

79 Of the cells with distinctive cone connectivity, FMB (n = 302, Supplementary Data Table 1f) and IMB  
80 cells (264 cells, Supplementary Data Table 1f; Fig. 3a, 3b) accounted for 62% of all bipolar cells. Blue-  
81 cone bipolar cells (BB cells; Fig. 3b, 3c; Extended Data Fig. 5) by contrast formed only 1.9% of all  
82 bipolar cells (17 cells, Supplementary Data Table 1f). Of the presumed OFF diffuse bipolar types we  
83 identified DB1<sup>13</sup> (54 cells), DB2 (92 cells) and DB3 (41 cells, Supplementary Data Table 1f, Fig. 3a, 3c)  
84 types. We could not further divide the outer DB3 cells into previously identified DB3a, DB3b types<sup>7-10</sup>.  
85 Instead, we found only two bipolar populations that costratified in the IPL and tiled the IPL with their  
86 axonal arbors that we therefore referred to as DB2 and DB3. The DB3 cells showed large axonal fields  
87 and likely correspond to the calbindin-positive DB3a type in macaque, marmoset and human retina<sup>11, 12</sup>,

88 <sup>14, 15</sup>. If this association holds then DB3b cells are either absent or present at a very low density in the  
 89 foveal DB population.

90 In the inner half of the IPL, DB4 (n = 34), DB5 (n = 45) and DB6 cells (n = 12, Supplementary Data  
 91 Table 1f; Fig. 3) were distinguished by axonal morphology, non-overlapping spatial arrangement and/or  
 92 stratification depth in the IPL. A small number of cells that remain to be studied in detail could include  
 93 the Giant type (n = 7, Supplementary Data Table 1f). Lastly, rod bipolar cells (RB, 6 cells, 0.7% of total  
 94 BCs, Supplementary Data Table 1f) made invaginating contacts<sup>16, 17</sup>, with rod spherules and showed  
 95 small unbranched axonal arbors that contained far fewer ribbon synapses ( $15.8 \pm 2.2$  ribbons, n = 5)  
 96 compared to diffuse or midget bipolar cells (see the detailed number of synapses in Extended Data Fig.  
 97 9)<sup>18, 19</sup>. As presented in the Results x-type bipolar cells (n = 20, Supplementary Data Table 1f) were  
 98 further distinguished by a lack of an outward extending dendrite but the presence of abundant ribbon  
 99 synapses in the axonal arbor (see also Extended Data Fig. 6). DBbroad cells (n = 18, Supplementary  
 100 Data Table 1f)) were distinguished by an axonal arbor that extended variably into both the outer-OFF  
 101 and inner-ON IPL and was presynaptic to both ON and OFF ganglion cell types. In the OPL, the  
 102 DBbroad cell dendrites remain to be completely proofread, but thus far we found only basal contacts  
 103 with cone pedicles and have placed the DBbroad cells provisionally in the OFF bipolar category, though  
 104 the lack of invaginating cone contacts does not preclude an ON-type response from these cells<sup>20</sup>.

105 **Amacrine cells.** Amacrine cell types show a great morphologically diversity and have been divided into  
 106 many more types than other retinal cell classes. The result is that with a few well studied exceptions  
 107 there is little consensus on the number of amacrine cell types and how they compare across species.  
 108 To annotate HFseg1 amacrine cells we started with the high density, small field AII amacrine (AC2, n = 75  
 109 cells, Supplementary Data Table 1g) that surprisingly accounted for over 25% of the amacrine cells with cell  
 110 bodies in the volume. These cells showed the characteristic lobular appendages making synaptic  
 111 output to cone bipolar cell axon terminals and long arboreal dendrites stratified near the IPL-GCL  
 112 border, despite the lack of rod bipolar axon terminals at this foveal location (Figs. 4a and 5). We

divided all small field ( $< 100 \mu\text{m}$  diam) amacrine cells, including AC2, into six provisional types (AC2, 3, 4, 5, 6 and 11) based on dendritic morphology, spatial tiling and IPL stratification depth, pending a more detailed analysis of their synaptic connectivity. Typical of the small field types, AC11 illustrated in Figure 4 ( $n = 22$ , Supplementary Data Table 1g) showed fine, densely branched, dendrites that defines a group of small field cells conventionally referred to as “knotty” amacrine<sup>21-23</sup>. The broadly stratified AC11 may correspond to the strongly parvalbumin positive cells described in macaque monkey<sup>24</sup>. Small field cells together accounted for ~65% of the amacrine cells in HFseg1.

Cells with larger ( $> 100 \mu\text{m}$ ) dendritic fields were divided into 13 provisional types based mainly on morphology (including nuclear staining pattern, see Extended Data Fig. 3) and stratification depth in the IPL. Some of these types were easily classified by well documented morphology (e.g., the starburst amacrine cells illustrated in Fig. 4 or the interplexiform cells illustrated in extended data Fig. 8). Almost all starbursts were found in the ganglion cell layer (GCL, see Fig. 4d), where they were the most numerous AC type (14/40 cells, 35%), consistent with previous estimates<sup>25, 26</sup>. Other large field types like AC12 ( $n = 6$ ; Extended data Fig. 8; Supplementary Data Table 1g) or AC8 (10 cells, Fig. 4g, 4h; Supplementary Data Table 1g) showed a stereotyped morphology and stratification pattern that made them relatively easy to classify. Several large field types showed sparsely branching dendrites and varied stratification patterns; for these groups and analysis of synaptic connectivity will be important for confirming or extending the current amacrine cell classification.

**Ganglion cells.** The morphology of the major, relatively high density, ganglion cell types, the midget, parasol and small bistratified cells is well established, and we therefore were able to annotate these clearly recognized types unequivocally without the need for detailed proofreading. As reviewed in the Results these cells accounted for ~96% of the total ganglion cells with cell bodies within the HFseg1 volume, leaving only 25 ganglion cells that remained to be characterized.

We divided these remaining large field cells into 5 provisional types. Large field type GC1 (LFGC1, 6 cells, Supplementary Data Table 1h; Fig. 7d, 7h) was postsynaptic to blue-cone bipolar cells and had a



138 dendritic tree that co-stratified with the small bistratified cells. These cells likely correspond to the large  
 139 bistratified GC observed in the human fovea<sup>27</sup> and marmoset and macaque retinal periphery<sup>28, 29</sup>.  
 140 Consistent with input from blue-cone bipolar cells these cells showed an ON-response to S cone  
 141 modulation in macaque retina<sup>28</sup>. Large field GC2 (LFGC2, 6 cells, Supplementary Data Table 1h; Fig. 7i,  
 142 7l) showed broadly stratified and densely branched dendritic trees; a counterpart in monkey retina  
 143 remains unclear<sup>30</sup> but similar morphology has been observed in human peripheral retina<sup>31</sup>. A third cell  
 144 group (LFGC3, 4 cells, Supplementary Data Table 1h; Fig. 7j, 7m) stratifies across the center of IPL  
 145 (Fig. 7j, 7m) and appears to correspond to previously described recursive bistratified cells, identified as  
 146 ON-OFF direction selective cells in the macaque monkey retina<sup>32</sup>. A fourth cell group (LFGC4, 5 cells,  
 147 Supplementary Data Table 1h; Fig. 7k, 7n) shows large cell bodies and radiate dendritic branching near  
 148 the center of the IPL co-stratified with the inner-ON and outer-OFF parasol cells (3 inner and 2 outer  
 149 stratified) and could correspond to the ON and OFF smooth mono-stratified types identified in macaque  
 150 and marmoset retina<sup>29, 32, 33</sup>. A fifth group of cells shows very sparsely branching dendrites stratified in  
 151 the inner IPL (LFGC5, 4 cells, Supplementary Data Table 1h) that could correspond to inner melanopsin  
 152 cells<sup>34</sup> (or an inner large sparse type recognized in macaque and marmoset<sup>29, 30</sup>). Lastly, a few very  
 153 sparsely branching GC processes (not linked to cell bodies within the volume) stratified along the outer  
 154 border of the IPL were also present, likely corresponding to outer melanopsin ganglion cells<sup>34</sup>. If  
 155 included in our current total this would give 7 large field types and a total of 12 ganglion cell types in  
 156 HFseg1.

157 **Glial cells.** The common radial glia of the retina, the Müller cells (MC, n = 555, Fig. 1; Supplementary  
 158 Data Table 1b), were unequivocally recognized as a clear population of cell bodies in the approximate  
 159 middle of the INL with large, irregularly shaped and euchromatic nuclei and a relatively filamentous,  
 160 dark cytoplasm. A sparsely distributed population of glial cells was also present in the GCL (Extended  
 161 Data Figs. 1b and 3b) and provisionally identified as astrocytes<sup>35</sup> (n = 32, Supplementary Data Table  
 162 1b). Astrocyte cell bodies and cytoplasm were similar in appearance to Müller cells. However, astrocyte

163 cell bodies apposed blood vessels in the GCL (Extended Data Fig. 3b) and gave rise to multiple  
164 dendrites that extended radially into the GCL and IPL (Extended Data Fig. 1b) and tended to fasciculate  
165 along blood vessels. Dendrites of these astrocytes were also restricted to the GCL and IPL and thus did  
166 not show the thick extension to the outer retina characteristic of Müller cells (Extended Data Fig. 1b).  
167 Our identification of small population microglial cells (n = 15, Supplementary Data Table 1b) was based  
168 on a characteristic dendritic morphology, nuclear morphology distinct from both Müller cells and  
169 astrocytes (Extended Data Fig. 3a-3c) and very lightly stained cytoplasm containing apparent cellular  
170 debris. The density of microglial cells was low, consistent with previous measurements in the macaque  
171 monkey foveal retina<sup>36, 37</sup>. In the current volume we have not yet attempted an analysis of blood vessel  
172 and associated pericytes, though these cellular elements are also segmented and are available to  
173 annotate and further characterize.

174

175

176 **Supplementary References**

- 177 1. Peichl, L., Sandmann, D. & Boycott, B.B. Comparative anatomy and function of mammalian  
178 horizontal cells. in *Development and Organization of the Retina* (ed. Chalupa & Finlay) 147-  
179 172 (Plenum Press, New York, 1998).
- 180 2. Dacheux, R.F. & Raviola, E. Physiology of HI horizontal cells in the primate retina.  
181 *Proc.R.Soc.Lond.B Biol.Sci.* **239**, 213-230 (1990).
- 182 3. Goodchild, A.K., Chan, T.L. & Grünert, U. Horizontal cell connections with short-wavelength-  
183 sensitive cones in macaque monkey retina. *Vis. Neurosci.* **13**, 833-845 (1996).
- 184 4. Kolb, H., Mariani, A. & Gallego, A. A second type of horizontal cell in the monkey retina.  
185 *J.Comp.Neurol.* **189**, 31-44 (1980).
- 186 5. Ahnelt, P. & Kolb, H. Horizontal cells and cone photoreceptors in human retina: A golgi-  
187 electron microscopic study of spectral connectivity. *J.Comp.Neurol.* **343**, 406-427 (1994).
- 188 6. Grünert, U. & Martin, P.R. Cell types and cell circuits in human and non-human primate retina.  
189 *Progress in retinal and eye research*, 100844 (2020).
- 190 7. Puthussery, T., *et al.* Kainate receptors mediate synaptic input to transient and sustained OFF  
191 visual pathways in primate retina. *J Neurosci* **34**, 7611-7621 (2014).
- 192 8. Puthussery, T., Venkataramani, S., Gayet-Primo, J., Smith, R.G. & Taylor, W.R. NaV1.1 channels  
193 in axon initial segments of bipolar cells augment input to magnocellular visual pathways in  
194 the primate retina. *J Neurosci* **33**, 16045-16059 (2013).
- 195 9. Tsukamoto, Y. & Omi, N. OFF bipolar cells in macaque retina: type-specific connectivity in the  
196 outer and inner synaptic layers. *Frontiers in neuroanatomy* **9**, 122 (2015).
- 197 10. Tsukamoto, Y. & Omi, N. Some OFF bipolar cell types make contact with both rods and cones  
198 in macaque and mouse retinas. *Frontiers in neuroanatomy* **8**, 105 (2014).
- 199 11. Haverkamp, S., Haeseleer, F. & Hendrickson, A. A comparison of immunocytochemical  
200 markers to identify bipolar cell types in human and monkey retina. *Visual neuroscience* **20**,  
201 589-600 (2003).

- 202 12. Masri, R.A., Grünert, U. & Martin, P.R. Analysis of Parvocellular and Magnocellular Visual  
203 Pathways in Human Retina. *J Neurosci* **40**, 8132-8148 (2020).
- 204 13. Puthussery, T., Gayet-Primo, J., Taylor, W.R. & Haverkamp, S. Immunohistochemical  
205 identification and synaptic inputs to the diffuse bipolar cell type DB1 in macaque retina. *J*  
206 *Comp Neurol* **519**, 3640-3656 (2011).
- 207 14. Grünert, U., Martin, P.R. & Wässle, H. Immunocytochemical analysis of bipolar cells in the  
208 macaque monkey retina. *J.Comp.Neurol.* **348**, 607-627 (1994).
- 209 15. Weltzien, F., Percival, K.A., Martin, P.R. & Grünert, U. Analysis of bipolar and amacrine  
210 populations in marmoset retina. *J Comp Neurol* **523**, 313-334 (2015).
- 211 16. Tsukamoto, Y. & Omi, N. Multiple Invagination Patterns and Synaptic Efficacy in Primate and  
212 Mouse Rod Synaptic Terminals. *Investigative ophthalmology & visual science* **63**, 11 (2022).
- 213 17. Saha, A., et al. Regional variation in the organization and connectivity of the first synapse in  
214 the primate night vision pathway. *iScience* **26**, 108113 (2023).
- 215 18. Grünert, U. & Martin, P.R. Rod bipolar cells in the macaque monkey retina: Immunoreactivity  
216 and connectivity. *J.Neurosci.* **11**, 2742-2758 (1991).
- 217 19. Kolb, H., Zhang, L. & Dekorver, L. Differential staining of neurons in the human retina with  
218 antibodies to protein kinase C isozymes. *Vis.Neurosci.* **10**, 341-351 (1993).
- 219 20. Calkins, D.J., Tsukamoto, Y. & Sterling, P. Foveal cones form basal as well as invaginating  
220 junctions with diffuse ON bipolar cells. *Vision Res.* **36**, 3373-3381 (1996).
- 221 21. Polyak, S.L. *The Retina* (University of Chicago Press, Chicago, 1941).
- 222 22. Mariani, A.P. Amacrine cells of the rhesus monkey retina. *J.Comp.Neurol.* **301**, 382-400  
223 (1990).
- 224 23. Boycott, B.B. & Dowling, J.E. Organization of the primate retina: light microscopy.  
225 *Philos.Trans.R.Soc.Lond.B Biol.Sci.* **255**, 109-184 (1969).
- 226 24. Klump, K.E., Zhang, A.J., Wu, S.M. & Marshak, D.W. Parvalbumin-immunoreactive amacrine  
227 cells of macaque retina. *Visual neuroscience* **26**, 287-296 (2009).

- 228 25. Rodieck, R.W. & Marshak, D.W. Spatial density and distribution of choline acetyltransferase  
229 immunoreactive cells in human, macaque, and baboon retinas. *J.Comp.Neurol.* **321**, 46-64  
230 (1992).
- 231 26. Zhang, C., *et al.* Development of ON and OFF cholinergic amacrine cells in the human fetal  
232 retina. *J Comp Neurol* **527**, 174-186 (2019).
- 233 27. Kim, Y.J., Packer, O. & Dacey, D.M. A circuit motif for color in the human foveal retina.  
234 *Proceedings of the National Academy of Sciences of the United States of America* **121**,  
235 e2405138121 (2024).
- 236 28. Dacey, D.M., Peterson, B.B., Robinson, F.R. & Gamlin, P.D. Fireworks in the primate retina: in  
237 vitro photodynamics reveals diverse LGN-projecting ganglion cell types. *Neuron* **37**, 15-27  
238 (2003).
- 239 29. Masri, R.A., Percival, K.A., Koizumi, A., Martin, P.R. & Grünert, U. Survey of retinal ganglion cell  
240 morphology in marmoset. *J Comp Neurol* **527**, 236-258 (2019).
- 241 30. Yamada, E., Bordt, A. & Marshak, D. Wide-field ganglion cells in macaque retinas. *Visual*  
242 *neuroscience* **22**, 383-393 (2005).
- 243 31. Peterson, B.B. & Dacey, D.M. Morphology of wide-field bistratified and diffuse human retinal  
244 ganglion cells. *Visual neuroscience* **17**, 567-578 (2000).
- 245 32. Kim, Y.J., *et al.* Origins of direction selectivity in the primate retina. *Nature communications*  
246 **13**, 2862 (2022).
- 247 33. Crook, J.D., *et al.* The smooth monostratified ganglion cell: evidence for spatial diversity in the  
248 Y-cell pathway to the lateral geniculate nucleus and superior colliculus in the macaque  
249 monkey. *J Neurosci* **28**, 12654-12671 (2008).
- 250 34. Liao, H.W., *et al.* Melanopsin-expressing ganglion cells on macaque and human retinas form  
251 two morphologically distinct populations. *J Comp Neurol* **524**, 2845-2872 (2016).
- 252 35. Masri, R.A., Greferath, U., Fletcher, E.L., Martin, P.R. & Grünert, U. Immunohistochemistry and  
253 spatial density of Müller cells in the human fovea. *Investigative ophthalmology & visual*  
254 *science in press* (2025).

- 255 36. Singaravelu, J., Zhao, L., Fariss, R.N., Nork, T.M. & Wong, W.T. Microglia in the primate macula:  
256 specializations in microglial distribution and morphology with retinal position and with aging.  
257 *Brain Struct Funct* **222**, 2759-2771 (2017).
- 258 37. Goyal, M., Bordt, A.S., Neitz, J. & Marshak, D.W. Trophocytosis of neurons and glial cells by  
259 microglia in a healthy adult macaque retina. *Sci Rep* **13**, 633 (2023).
- 260
